# Supplementary material for: The stiffening of the cell walls observed during physiological softening of pears
Source: PubMed Central journal article supplement (PMC4722064; doi:10.1007/s00425-015-2423-0), 2015-10-26
Supplement: 425_2015_2423_MOESM2_ESM.pdf [file 425_2015_2423_MOESM2_ESM.pdf]

## The stiffening of the cell walls observed during physiological softening of pears

Planta

Artur Zdunek<sup>1\*</sup>, Arkadiusz Koziol<sup>1</sup>, Justyna Cybulska<sup>1</sup>, Małgorzata Lekka<sup>2</sup>, Piotr M. Pieczywek<sup>1</sup>

<sup>1</sup>Institute of Agrophysics, Polish Academy of Sciences, Doświadczalna 4, 20-290 Lublin, Poland,

<sup>2</sup>The Henryk Niewodniczański Institute of Nuclear Physics, Polish Academy of Sciences, Radzikowskiego 152, 31-342 Kraków, Poland

\*corresponding author a.zdunek@ipan.lublin.pl

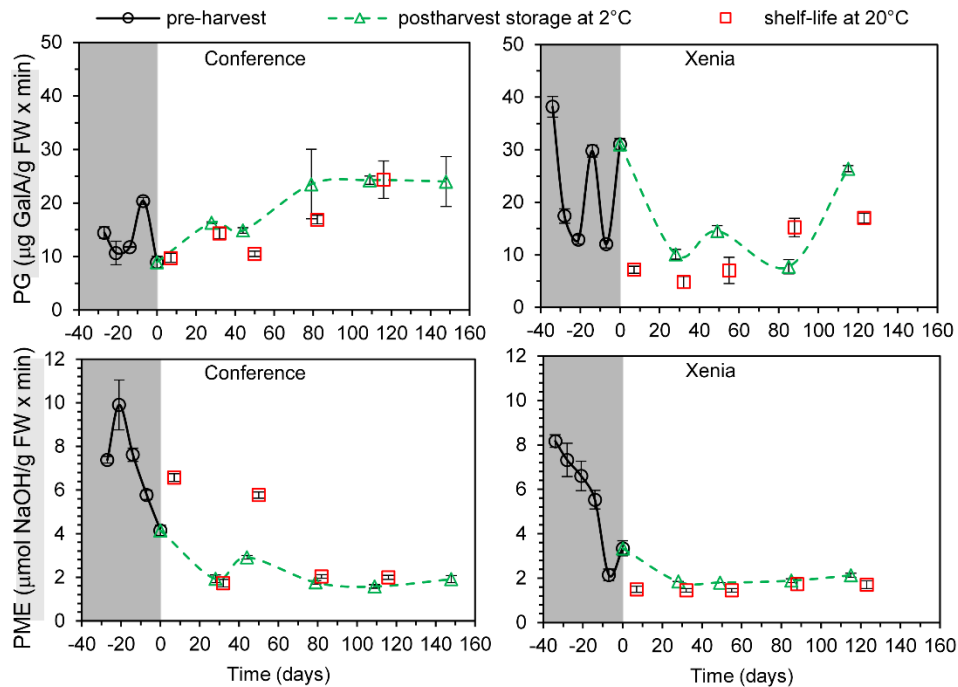

**ESM\_2.** Polygalacturonase (PG) and pectin methylesterase (PME) activity in the studied pears (‘*Xenia*’ and ‘*Conference*’) during pre-harvest maturation (shadowed part, open circles) and postharvest storage period in a cold room at 2°C and RH~80-90% in normal atmosphere (green triangles). Time zero means the harvest time. Squares present shelf life points after predated storage in a cold room. Error bars are standard deviations.
